# Supplementary material
Source: publisher figshare collection journal article supplement (https://sage.figshare.com/ndownloader/files/18169838)
Supplement: Supplementary file 1 [file 18169838]

## HYPNOSIS EVALUATION QUESTIONNAIRE

### Patient questionnaire:

- COMFORT: This treatment with local anesthesia associated with hypnosis had made the procedure
  - Comfortable
  - Arduous but acceptable
  - Unbearable
- HELP: Did hypnosis help you?
  - Yes
  - A little
  - No
- SUPPORT: What information about hypnosis did you have in preoperative?
  - Written
  - Oral
  - Both
- INFORMATION: Information was
  - Sufficient
  - Insufficient
- EXPECTATION: Is this hypnotic experience in accordance with your expectations?
  - Yes
  - No
- REVISIT: In the same situation, would you undergo surgery with hypnosis in the same way again?
  - Yes
  - No
- RECOMMEND: Would you recommend it to another person?
  - Yes
  - No
- GSI: Global Satisfaction Index: Visual analogic scale quoted from 0 to 10
